# Supplementary material
Source: ML conference proceedings conference paper supplement (https://proceedings.mlr.press/v119/chatziafratis20a.html)
Supplement: Supplementary file [file chatziafratis20a-supp.pdf]

---

# Supplementary Material for Better Depth-Width Trade-offs for Neural Networks

## through the lens of Dynamical Systems

---

Vaggos Chatziafratis<sup>1</sup> Sai Ganesh Nagarajan<sup>2</sup> Ioannis Panageas<sup>2</sup>

### A. Proof of Claim 2

*Proof.* For  $p = 3$ , the desired equation holds, since the matrix  $A^\top$  becomes just

$$A^\top = \begin{pmatrix} 1 & 1 \\ 1 & 0 \end{pmatrix},$$

with characteristic polynomial  $(\lambda - 1)\lambda - 1 = \lambda^2 - \lambda - 1$ . Let  $I$  denote the identity matrix of size  $(p - 1) \times (p - 1)$ . Assume  $p \geq 5$ . We consider the matrix:

$$A^\top - \lambda I = \begin{pmatrix} A_{11} & A_{12} \\ A_{21} & A_{22} \end{pmatrix}$$

where  $A_{11} := \begin{pmatrix} 1 - \lambda & 0 & 0 & 0 & 0 & \dots & 0 \\ 0 & -\lambda & 0 & 0 & 0 & \dots & 0 \\ 0 & 0 & -\lambda & 0 & 0 & \dots & 0 \\ \vdots & \vdots & \vdots & \vdots & \vdots & \vdots & \vdots \\ 0 & 0 & 0 & 0 & 0 & \dots & -\lambda \end{pmatrix}$ ,  $A_{12} := \begin{pmatrix} 1 & 0 & 0 & 0 & \dots & 0 \\ 0 & 1 & 0 & 0 & \dots & 0 \\ 0 & 0 & 1 & 0 & \dots & 0 \\ \vdots & \vdots & \vdots & \vdots & \vdots & \vdots \\ 0 & 0 & 0 & 0 & \dots & 1 \end{pmatrix}$ ,

$$A_{21} := \begin{pmatrix} 0 & 1 & 0 & 0 & \dots & 0 & 0 \\ 0 & 0 & 1 & 0 & \dots & 0 & 0 \\ \vdots & \vdots & \vdots & \vdots & \vdots & \vdots & \vdots \\ 0 & 0 & 0 & 0 & \dots & 0 & 1 \\ 1 & 1 & 1 & 1 & \dots & 1 & 1 \end{pmatrix}$$
, and  $A_{22} := \begin{pmatrix} -\lambda & 0 & 0 & \dots & 0 & 0 \\ 0 & -\lambda & 0 & \dots & 0 & 0 \\ \vdots & \vdots & \vdots & \vdots & \vdots & \vdots \\ 0 & 0 & 0 & \dots & -\lambda & 0 \\ 0 & 0 & 0 & \dots & 0 & -\lambda \end{pmatrix}$ .

Observe that  $\lambda = 0$  is not an eigenvalue of the matrix  $A^\top$ . Suppose that  $A_{11}, A_{12}, A_{21}, A_{22}$  are the four block submatrices of the matrix above. Using Schur's complement, we get that  $\det(A^\top - \lambda I) = \det(A_{22}) \times \det(A_{11} - A_{12}A_{22}^{-1}A_{21})$ , where  $\det(A_{22}) = (-\lambda)^{\frac{p-1}{2}}$  and

$$\lambda^{\frac{p-1}{2}} \det(A_{11} - A_{12}A_{22}^{-1}A_{21}) = \begin{pmatrix} \lambda - \lambda^2 & 1 & 0 & 0 & 0 & \dots & 0 \\ 0 & -\lambda^2 & 1 & 0 & 0 & \dots & 0 \\ 0 & 0 & -\lambda^2 & 1 & 0 & \dots & 0 \\ \vdots & \vdots & \vdots & \vdots & \vdots & \vdots & \vdots \\ 1 & 1 & 1 & 1 & \dots & 1 & -\lambda^2 + 1 \end{pmatrix}.$$

We can multiply the first row by  $\frac{1}{\lambda(\lambda-1)}$ , the second row by  $\frac{1}{\lambda^2} + \frac{1}{\lambda^2\lambda(\lambda-1)}$ , the third row by  $\frac{1}{\lambda^2} + \frac{1}{\lambda^4} + \frac{1}{\lambda^4\lambda(\lambda-1)}, \dots$ , the

---

<sup>1</sup>Department of Computer Science, Stanford University <sup>2</sup>Singapore University of Technology and Design. Correspondence to: Vaggos Chatziafratis <vaggos@cs.stanford.edu>, Sai Ganesh Nagarajan <sai\_nagarajan@mymail.sutd.edu.sg>, Ioannis Panageas <ioannis@sutd.edu.sg>.

$i$ -th row by  $\sum_{j=1}^{i-1} \frac{1}{\lambda^{2j}} + \frac{1}{\lambda^{2(i-1)} \cdot \lambda(\lambda-1)}$  (and so on) and add them to the last row. Let  $B$  be the resulting matrix:

$$B = \begin{pmatrix} \lambda - \lambda^2 & 1 & 0 & 0 & 0 & \dots & 0 \\ 0 & -\lambda^2 & 1 & 0 & 0 & \dots & 0 \\ 0 & 0 & -\lambda^2 & 1 & 0 & \dots & 0 \\ \vdots & \vdots & \vdots & \vdots & \vdots & \vdots & \vdots \\ 0 & 0 & 0 & 0 & \dots & 0 & K \end{pmatrix},$$

where  $K = -\lambda^2 + 1 + \sum_{j=1}^{\frac{p-5}{2}} \frac{1}{\lambda^{2j}} + \frac{1}{\lambda^{p-5} \cdot \lambda(\lambda-1)}$ . It is clear that the equation  $\det(B) = 0$  has the same roots as  $\det(A^\top - \lambda I) = 0$ . Since  $B$  is an upper triangular matrix, it follows that

$$\det(B) = (-1)^{\frac{p-5}{2}} \lambda(\lambda-1) \lambda^{p-5} \cdot \left( -\lambda^2 + 1 + \sum_{j=1}^{\frac{p-5}{2}} \frac{1}{\lambda^{2j}} + \frac{1}{\lambda^{p-5} \cdot \lambda(\lambda-1)} \right).$$

We conclude that the eigenvalues of  $A^\top$  (and hence of  $A$ ) must be roots of

$$\begin{aligned} & (\lambda^{p-3} - \lambda^{p-4}) \left( 1 - \lambda^2 + \sum_{j=1}^{\frac{p-5}{2}} \frac{1}{\lambda^{2j}} \right) + 1 = -\lambda^{p-1} + \lambda^{p-2} + \lambda^{p-3} - \lambda^{p-4} + \sum_{j=1}^{\frac{p-5}{2}} \lambda^{p-3-2j} - \lambda^{p-4-2j} + 1 \\ & = -\lambda^{p-1} + \lambda^{p-2} + \sum_{j=0}^{p-3} (-1)^j \lambda^j = \frac{-\lambda^p + \lambda^{p-2}}{\lambda+1} + \frac{1 + \lambda^{p-2}}{\lambda+1} = \frac{-\lambda^p + 2\lambda^{p-2} + 1}{\lambda+1}, \end{aligned}$$

and the claim follows.  $\square$

## B. Proof of Corollary 3.5

*Proof.* We first need to relate the spectral radius with the number of oscillations. We follow the idea from (Chatziafratis et al., 2020) which concludes that  $\delta_0^t \geq \|A^t\|_\infty \geq \text{spec}(A^t) = \text{spec}(A)^t = \rho_p^t$  (where  $\text{spec}(A)$  denotes the spectral radius), that is the growth rate of the number of oscillations of compositions of  $f$  is at least  $\rho_p$ .

Assume  $1 < p$  be an odd number. It suffices to show that  $\rho_{p+2} < \rho_p$  (and then use induction). Observe that  $\lambda^{p+2} - 2\lambda^p - 1 = \lambda^2(\lambda^p - 2\lambda^{p-2} - 1) + \lambda^2 - 1$ . Therefore

$$0 = q_{p+2}(\rho_{p+2}) = \rho_{p+2}^2 q_p(\rho_{p+2}) + \rho_{p+2}^2 - 1,$$

hence since  $\rho_{p+2} > 1$  we conclude that  $q_p(\rho_{p+2}) < 0$ . Since  $\lim_{\lambda \rightarrow \infty} q_p(\lambda) = +\infty$ , by Bolzano's theorem it follows that  $q_p$  has a root in the interval  $(\rho_{p+2}, +\infty)$ . Thus  $\rho_p > \rho_{p+2}$ . One can also see that  $\sqrt{2}^p - 2\sqrt{2}^{p-2} - 1 = -1 < 0$  and  $2^p - 2 \cdot 2^{p-2} - 1 > 0$ , thus from Bolzano's again, it follows that  $\rho_p > \sqrt{2}$  for all  $p$ .  $\square$

## C. Proof of Lemma 3.6

*Proof.* It suffices to show that  $f$  has period  $p$  (the Lipschitz constant is trivially  $\rho_p$ ). We start from  $z_0 = 0$  and we get  $z_t = f(z_{t-1}) = \rho_p |z_{t-1}| - 1$  for  $1 \leq t \leq p$ . Observe that  $z_1 = -1$ ,  $z_2 = \rho_p - 1 > 0$ . Set  $q_i(\lambda) = \frac{\lambda^i - 2\lambda^{i-2} - 1}{\lambda + 1}$ . First, we shall show that for  $t \in \{3, \dots, p-1\}$ , we have  $z_t \leq 0$  and that  $z_t = q_t(\rho_p)$ , whereas for  $t$  even, we have  $z_t = -q_{t-1}(\rho_p)\rho_p - 1$  in the interval above.

For  $t = 3$  we get that  $z_3 = \rho_p^2 - \rho_p - 1 = q_3(\rho_p) \leq 0$  because we showed  $\rho_p$  is decreasing in  $p$  and moreover holds  $q_3(\rho_3) = 0$ . Since  $z_3 \leq 0$  we get that  $z_4 = -\rho_p z_3 - 1 = q_3(\rho_p)\rho_p - 1$ . Let us show that  $z_4 \leq 0$ . Observe that  $z_4 = -\rho_p^3 + \rho_p^2 + \rho_p - 1 = (\rho_p - 1)(1 - \rho_p^2) < 0$  (since  $\rho_p > \sqrt{2}$ ).

We will use induction. Assume now, that we have the result for some  $t$  even, we need to show that  $z_{t+1} = q_{t+1}(\rho_p)$ ,  $z_{t+2} = -q_{t+1}(\rho_p)\rho_p - 1$  and moreover  $z_{t+1}, z_{t+2} \leq 0$ .

By induction, we have that  $z_{t-1}, z_t \leq 0$  and  $z_t = -q_{t-1}(\rho_p)\rho_p - 1$ , hence  $z_{t+1} = -\rho_p(-q_{t-1}(\rho_p)\rho_p - 1) - 1 = \frac{\rho_p^{t+1} - 2\rho_p^t - \rho_p^2}{\rho_p + 1} + \rho_p - 1 = q_{t+1}(\rho_p)$ . Since  $\rho_p$  is decreasing in  $p$  and  $q_{t+1}(\rho_{t+1}) = 0$ , we conclude that  $z_{t+1} \leq 0$ . Since

$z_{t+1} \leq 0$ , we get that  $z_{t+2} = -\rho_p z_{t+1} - 1 = -\rho_p q_{t+1}(\rho_p) - 1$ . To finish the claim, it suffices to show that  $z_{t+2} \leq 0$ . Observe that

$$\begin{aligned} -\rho_p q_{t+1}(\rho_p) - 1 &= -\rho_p \left( \rho_p^t - \rho_p^{t-1} - \sum_{j=0}^{t-2} (-\rho_p)^j \right) - 1 \\ &= -\rho_p^{t+1} + \rho_p^t - \sum_{j=1}^{t-1} (-\rho_p)^j - 1 \\ &= -2\rho_p^{t+1} + 2\rho_p^t + \frac{q_{t+1}(\rho_p)}{\rho_p + 1}. \end{aligned}$$

The term  $-2(\rho_p^{t+1} - \rho_p^t) < 0$  (since  $\rho_p > 1$ ) and moreover  $\frac{q_{t+1}(\rho_p)}{\rho_p + 1} \leq 0$  because  $\rho_p$  is decreasing in  $p$  and  $t + 1 \leq p - 1$ . Hence  $z_{t+2} \leq 0$  and the induction is complete.

From the above, we conclude that  $z_p = -\rho_p z_{p-1} - 1 = q_p(\rho_p) = 0$ , thus  $z_0, \dots, z_{p-1}$  form a cycle. If we show that  $z_0, \dots, z_{p-1}$  are distinct, the proof of the lemma follows.

First observe that  $q_t(\lambda) = \frac{\lambda^t - 2\lambda^{t-2} - 1}{\lambda + 1}$  is strictly increasing in  $t$  as long as  $\lambda > \sqrt{2}$  (by computing the derivative). Therefore it holds that  $z_3 < z_5 < \dots < z_p = 0$  (for all the odd indices) and also  $z_1 < z_3$ . Furthermore,  $-\lambda q_t(\lambda) - 1$  is decreasing in  $t$  for  $\lambda > \sqrt{2}$ , therefore we conclude  $z_4 > \dots > z_{p-1}$  (and also  $z_2 > 0 \geq z_4$ ).

We will show that  $z_3 > z_4$  and finally  $z_{p-1} > -1 = z_1$  and the lemma will follow. Recall  $z_3 = \rho_p^2 - \rho_p - 1$  and  $z_4 = -\rho_p^3 + \rho_p^2 + \rho_p - 1$ . Equivalently, we need to show that  $\rho_p^2 - \rho_p - 1 > -\rho_p^3 + \rho_p^2 + \rho_p - 1$  or  $\rho_p^3 - 2\rho_p > 0$  which holds because  $\rho_p > \sqrt{2}$ . Finally  $z_{p-1} = -\rho_p z_{p-2} - 1 > -1$  since  $z_{p-2} < z_p = 0$ .

□

## D. Sensitivity to Lipschitzness and separation examples based on periods

We consider three regimes. The first regime corresponds to the functions that appear in [Lemma 3.2](#), where  $L = \rho_p$  and  $\rho_p \in [\sqrt{2}, \phi]$ , where  $\phi = \frac{1+\sqrt{5}}{2} \approx 1.618$  is the golden ratio. The second regime corresponds to the case when  $L > \phi$  and the third regime corresponds to the case when  $L < \sqrt{2}$ . We can see in [Figure 1](#) that the function  $f(x) := 2|x| - 1$  has period 3 and a Lipschitz constant of  $L = 2$ , while in [Figure 2](#), we can see that the function  $f(x) := 1.2|x| - 1$ , does not have any odd period and  $L = 1.2$ .

[Figure 1](#) and [Figure 2](#) correspond to cases where the Lipschitz constant of the function does not match  $\rho_p$ .

- When  $\sqrt{2} \leq L \leq \phi$ , we see from [Figure 3](#), how small differences in the values of the slope can lead to the existence of different (prime) periods, which consequently lead to different depth-width trade-offs.
- When  $L > \phi$ , we can see from [Figure 1](#) that  $L = 2$  and also the growth rate of oscillations is 2. This means that  $L = \rho$  and that  $L^1$  separation is achievable. Note that period 3 is present in the tent map, so  $\rho_3 = \phi$  for this case.
- When  $L < \sqrt{2}$ , we can see from [Figure 2](#) that the oscillations do not grow exponentially with compositions and that the existing ones are of small magnitude, which means that the  $L^1$  error can be made arbitrarily small. Observe here that no odd period is present in the function (as this would imply that  $L \geq \rho \geq \sqrt{2}$ ).

## References

Chatziafratis, V., Nagarajan, S. G., Panageas, I., and Wang, X. Depth-width trade-offs for relu networks via sharkovsky's theorem. *International Conference on Learning Representations, Addis Ababa, Africa, 2020*.

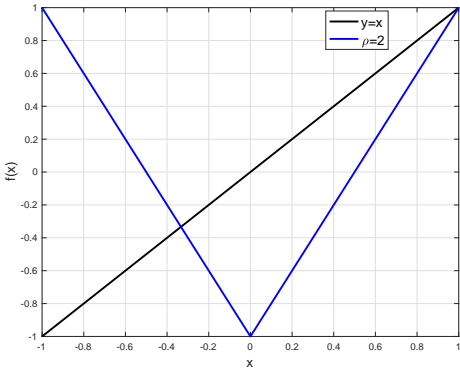

(a) Graph of  $f(x)$  intersected with  $y = x$ , to identify period 1 points.

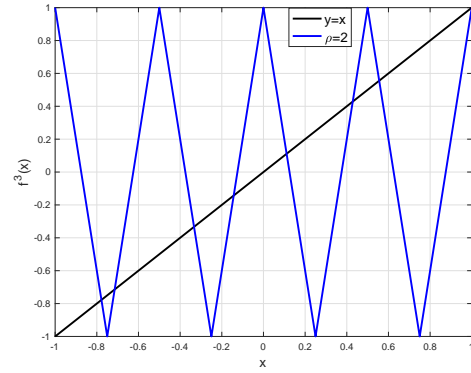

(b) Graph of  $f^3(x)$  intersected with  $y = x$ , to identify period 3 points.

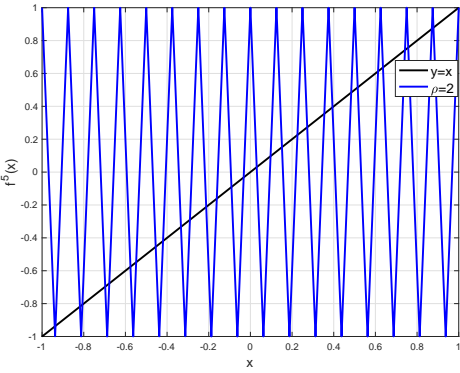

(c) Graph of  $f^5(x)$  intersected with  $y = x$ , to identify period 5 points.

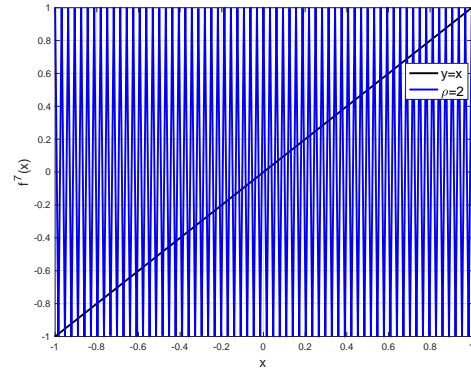

(d) Graph of  $f^7(x)$  intersected with  $y = x$ , to identify period 7 points.

Figure 1. Here  $L = 2$ , and this function has period 3. However, the growth rate of oscillations is exactly 2 and since we have equality  $L = \rho$  we get  $L^1$  separations even though the largest root  $\rho_3 = \phi < 2$ .

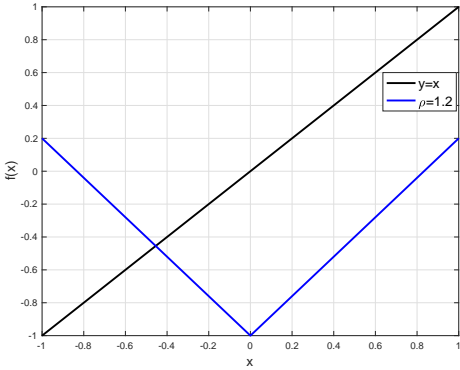

(a) Graph of  $f(x)$  intersected with  $y = x$ , to identify period 1 points.

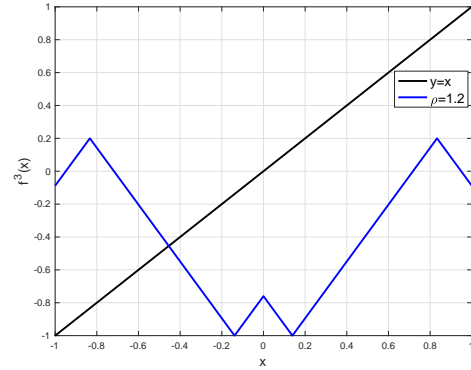

(b) Graph of  $f^3(x)$  intersected with  $y = x$ , to identify period 3 points.

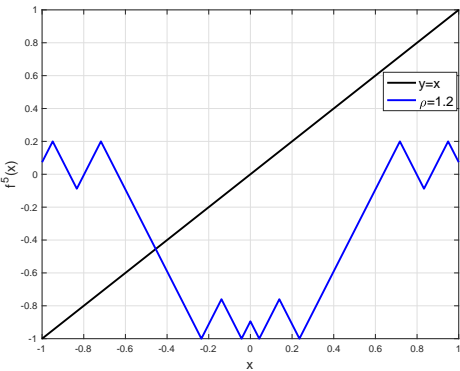

(c) Graph of  $f^5(x)$  intersected with  $y = x$ , to identify period 5 points.

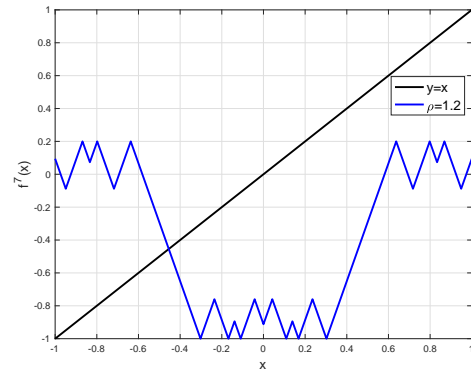

(d) Graph of  $f^7(x)$  intersected with  $y = x$ , to identify period 7 points.

Figure 2. Here  $L = 1.2$  that corresponds to the regime where  $L < \sqrt{2}$ . It follows that this function cannot have any odd period (because then  $L \geq \rho \geq \sqrt{2}$ ). Observe that the oscillations do not grow exponentially fast and they shrink in area, hence no  $L^1$  separation is achievable.

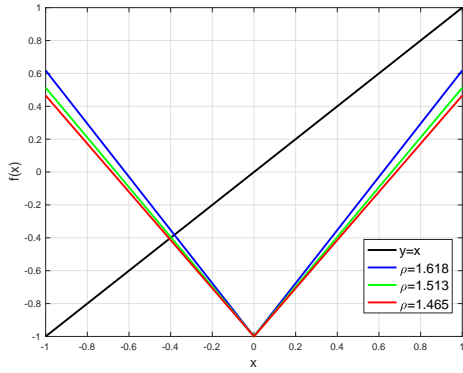

(a) Graph of  $f(x)$  is shown. The regime  $\sqrt{2} \leq L \leq \phi$  with small slope variations.

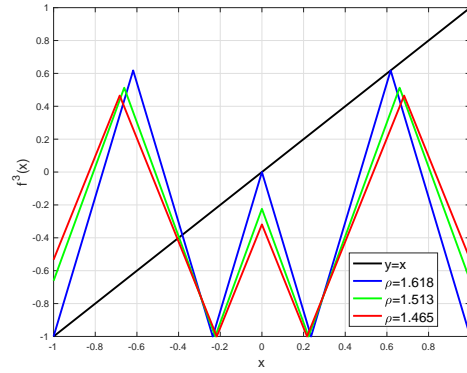

(b) Graph of  $f^3(x)$ . When  $L = \phi$ , period 3 is present (trade-offs with base  $\phi$ ).

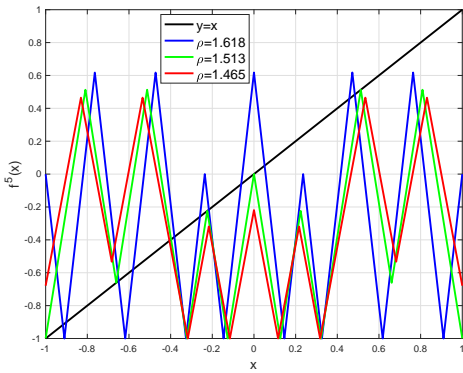

(c) Graph of  $f^5(x)$ . When  $L = 1.513$ , period 5 is present (trade-offs with base 1.513).

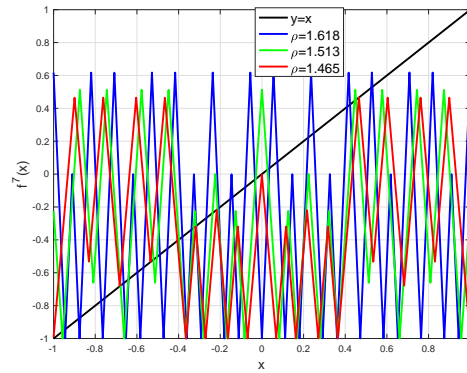

(d) Graph of  $f^7(x)$ . When  $L = 1.465$ , period 7 is present (trade-offs with base 1.465).

Figure 3. Functions parameterized by  $\rho_p$  for  $L = \rho_p$  and  $\rho = 1.618, 1.513, 1.465$  with periods 3, 5 and 7 respectively (see intersection with  $y = x$ ). Slight changes lead to different trade-offs.
